# Supplementary material for: A straightforward approach to high purity sodium silicide Na4Si4
Source: Royal Society of Chemistry journal article supplement (doi:10.1039/d1dt03203h), 2021-01-01
Supplement: d1dt03203h1.pdf [file d1dt03203h1.pdf]

## Supporting information

### A straightforward approach to high purity sodium silicide $\text{Na}_4\text{Si}_4$

Yang Song,<sup>a</sup> Isabel Gómez-Recio,<sup>a</sup> Ram Kumar <sup>a</sup>, Cristina Coelho Diogo,<sup>b</sup> Sandra Casale,<sup>c</sup>  
Isabelle Génois,<sup>a</sup> David Portehault<sup>a,\*</sup>

<sup>a</sup> Sorbonne Université, CNRS, Collège de France, Laboratoire de Chimie de la Matière Condensée de Paris (CMCP), 4 place Jussieu, F-75005, Paris, France

<sup>b</sup> Sorbonne Université, CNRS, Institut des Matériaux de Paris-Centre, IMPC, F-75005, Paris, France

<sup>c</sup> Sorbonne Université, CNRS, Laboratoire de Réactivité de Surface (LRS), 4 place Jussieu, F-75005, Paris, France

**Table S1** Comparison of reported syntheses towards Na<sub>4</sub>Si<sub>4</sub>

| Reactants                                     | Setup                                                            | Ball-milling time | Reaction time | Reaction temperature | Purity             | Purification procedure                                                         | Ref.             |
|-----------------------------------------------|------------------------------------------------------------------|-------------------|---------------|----------------------|--------------------|--------------------------------------------------------------------------------|------------------|
| NaH+Si nanoparticles<br>Na in 10 mol.% excess | Covered h-BN crucible in a quartz tube                           | 2min              | 24h           | 395°C                | 98%                | /                                                                              | <b>This work</b> |
| NaH+Si<br>Na in 90 mol.% excess               | Covered alumina crucible in a silica glass tube                  | 30min             | 48h           | 420°C                | Na detected by XRD | /                                                                              | 30               |
| NaH+Si<br>Na in 60 mol.% excess               | Covered alumina crucible                                         | 1h                | 48h           | 395°C                | /                  | Excess Na removed by vacuum at 250°C for 3h                                    | 19               |
| Na+Si<br>Na in slight excess                  | Ta crucible sealed in stainless steel tube                       | /                 | 72h           | 650°C                | /                  | Excess Na removed by evacuation at 300°C for 6h                                | 7                |
| Na+Si<br>Na in 10 mol.% excess                | Nb tube welded with Ar arc welder, sealed in fused silica jacket | /                 | 83h           | 650°C                | /                  | Excess Na removed by vacuum sublimation at 300°C                               | 25               |
| Na+Si<br>Na in excess                         | Closed Ta container sealed in evacuated quartz glass ampoule     | /                 | 100h          | 750°C                | /                  | Excess Na removed by vacuum distillation at 230 °C and 5.10 <sup>-6</sup> mbar | 23               |
| Na+Si<br>Na in 6 mol.% excess                 | Ni crucible sealed in steel autoclave                            | /                 | 30-40h        | 650°C                | /                  | Excess Na removed at 240°C for 15-20h                                          | 26               |
| Na+Si<br>Na in 10 mol.% excess                | W crucible sealed in stainless steel canister                    | /                 | 36h           | 650°C                | Na in excess       | /                                                                              | 27               |
| Na+Si<br>Stoichiometric mixture               | Sealed Ta tube                                                   | /                 | 1h10min       | 800-1200°C           | 44% (Si in excess) | /                                                                              | 6                |
| Na+silica gel                                 | Sealed Erlenmeyer flask                                          | /                 | /             | 400°C                | 15%                | /                                                                              | 28               |

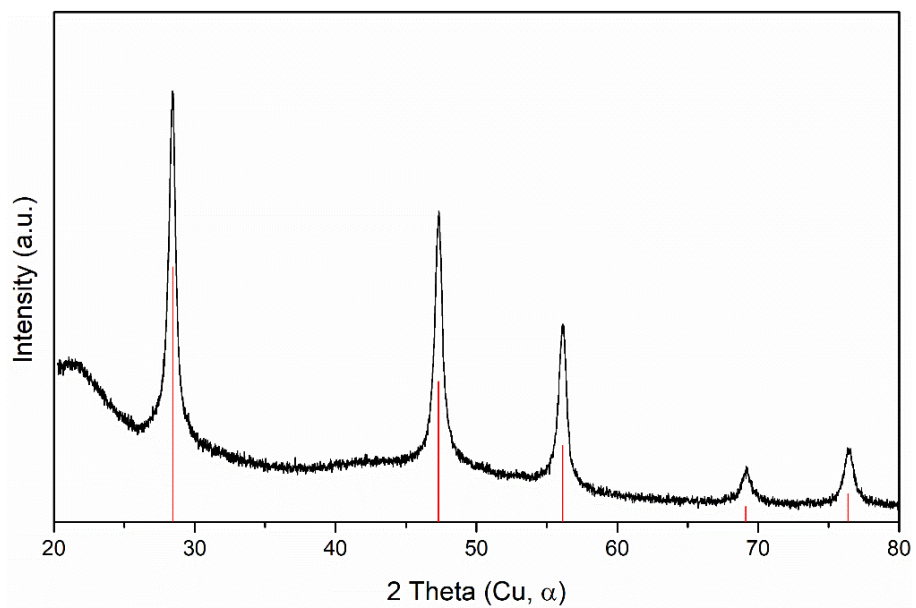

**Figure S1.** Powder XRD pattern (bottom) of Si nanoparticles used as reagents. The XRD pattern is indexed along the silicon diamond structure (red bars).

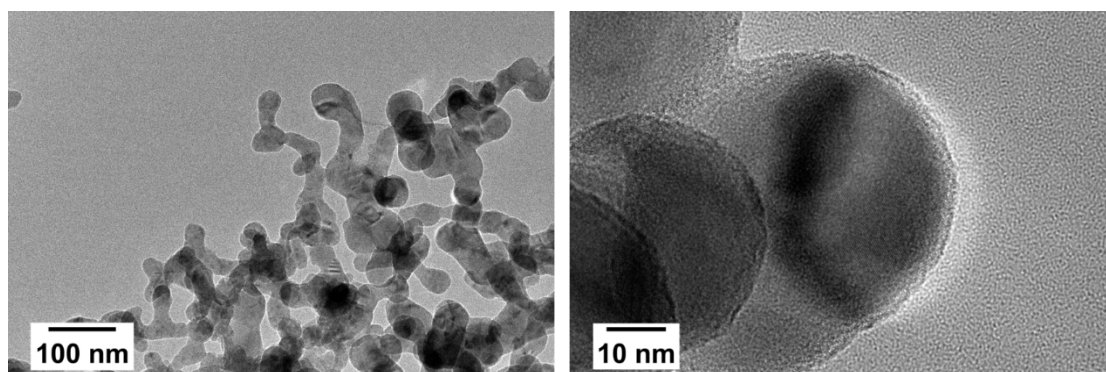

**Figure S2.** TEM images of as-received Si nanoparticles used as reagents.

**Table S2.** Na<sub>4</sub>Si<sub>4</sub> lattice parameters obtained by Le Bail analysis of the XRD pattern of the powder obtained at 395 °C for 24 h under 55 mL min<sup>-1</sup> Ar flow for a NaH:Si = 1.1:1 mol. reagent ratio.

|                | Na <sub>4</sub> Si <sub>4</sub> | NaOH        |
|----------------|---------------------------------|-------------|
| S.G.           | <i>C2/c</i>                     | <i>Cmcm</i> |
| a (Å)          | 12.1727(2)                      | 3.3990(1)   |
| b (Å)          | 6.5684(1)                       | 11.4366(6)  |
| c (Å)          | 11.1442(1)                      | 3.4054(1)   |
| β (°)          | 119.1546(9)                     |             |
| χ <sup>2</sup> | 4.22                            |             |

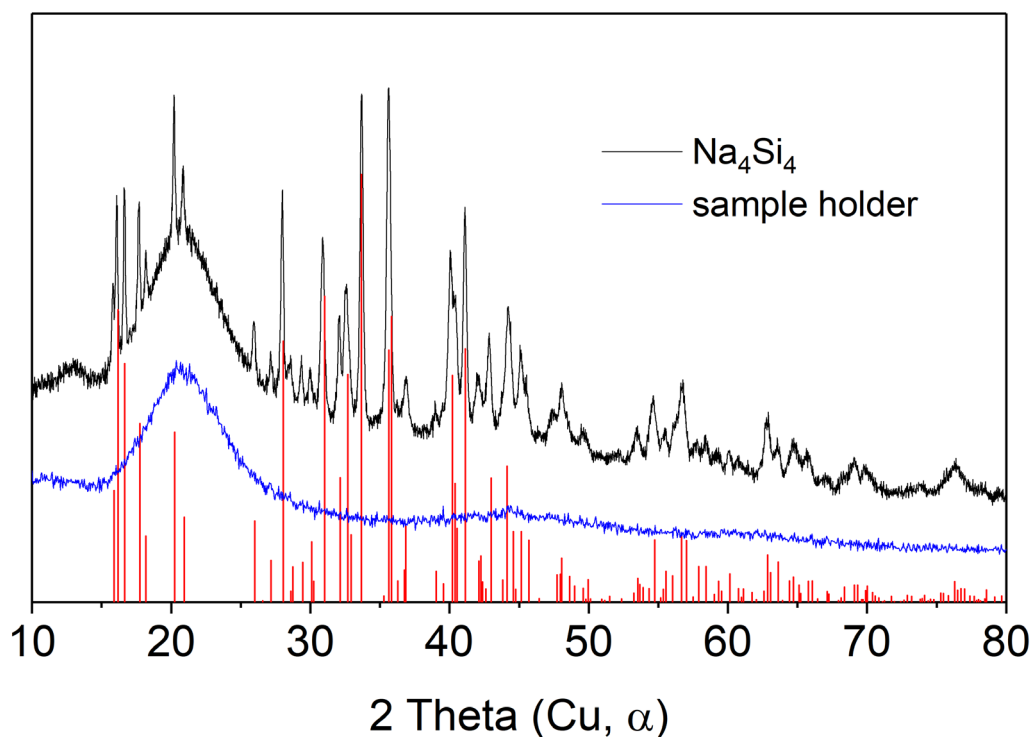

**Figure S3.** Quickly acquired (5 min) powder XRD pattern of the Na<sub>4</sub>Si<sub>4</sub> sample obtained at 395 °C for 24 h under 55 mL min<sup>-1</sup> Ar flow for a NaH:Si = 1.1:1 mol. reagent ratio. Red drop lines indicate Na<sub>4</sub>Si<sub>4</sub> reference. The blue line shows the experimental diagram recorded for the empty sample holder equipped with the scattering plastic dome. The absence of a peak at 38.2° (2theta Cu Kα) indicates the absence of crystalline NaOH.

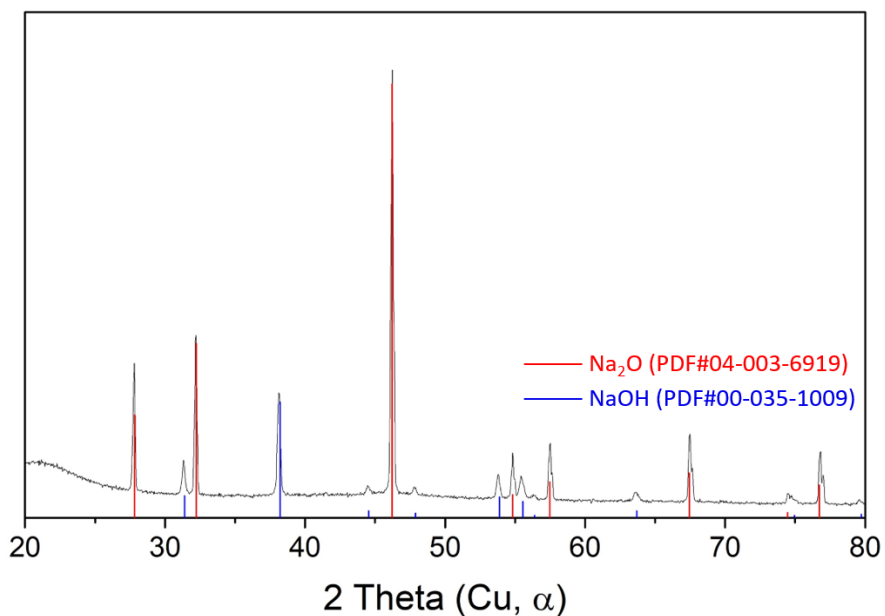

**Figure S4.** Powder XRD pattern of the white pellet on the top of the as-prepared product of  $\text{Na}_4\text{Si}_4$  synthesis.

**Table S3.** Lattice parameters obtained by Le Bail analysis of the XRD pattern of the clathrate powders obtained by  $\text{Na}_4\text{Si}_4$  thermal decomposition at 470 and 440 °C.

|                              | S.G      | $a_{470^\circ\text{C}}$ (Å) | $a_{440^\circ\text{C}}$ (Å) |
|------------------------------|----------|-----------------------------|-----------------------------|
| $\text{Na}_8\text{Si}_{46}$  | Pm-3n    | 10.1943(1)                  | 10.2050(3)                  |
| $\text{Na}_x\text{Si}_{136}$ | Fd-3m    |                             | 14.6581(1)                  |
| Si                           | Fd3-m    | 5.4248(1)                   | 5.4418(2)                   |
|                              | $\chi^2$ | 4.78                        | 4.17                        |
